# Supplementary material for: Ni(0) or Cu(0) catalyzed cleavage of the unactivated C–Cl bond of 2-chloro-1,1,1-trifluoroethane (HCFC-133a) via a single electron transfer (SET) process
Source: Royal Society of Chemistry journal article supplement (doi:10.1039/c2sc01083f), 2012-01-01
Supplement: c2sc01083f.pdf [file c2sc01083f.pdf]

## Electronic Supplementary Information

**Ni(0) or Cu(0) catalyzed cleavage of carbon-chlorine bond of 2-chloro-1,1,1-trifluoroethane (HCFC-133a) via Single Electron Transfer (SET) process**

Tang Xiao-Jun and Chen Qing-Yun\*

Key Laboratory of Organofluorine Chemistry, Shanghai Institute of Organic Chemistry, Chinese Academy of Sciences, 345 Lingling Lu, 200032 Shanghai, China  
E-mail: chenqy@sioc.ac.cn

- I. General Procedures (S1)
- II. Experimental Procedures (S2-S5)
- III. Reference (S6)
- IV. GC-MS spectral for HFC-143a and VDF (S7-S9)
- V. Spectral Data for new compounds (S10-S19)

## I, General Procedure

All reactions were carried out under the N<sub>2</sub> atmosphere, DMF, DMSO and MeCN were distilled prior to use. Reagents were purchased at the commercial quality and used without further purification, unless otherwise stated. 2-chloro-1,1,1-trifluoroethane(HCFC-133a) was used in the form of fresh DMF solution.

<sup>1</sup>H NMR were recorded on a Bruker 300MHz or Varian 300MHz spectrometer. Chemical shifts are reported in ppm relative to TMS as a reference (CDCl<sub>3</sub> = 7.26 ppm) The following abbreviations are used to explain the multiplicities: s = singlet, d = doublet, t = triplet, q = quartet, m = multiplet, br = broad. <sup>19</sup>F NMR spectra were recorded on a Bruker 300 MHz or Varian 300MHz spectrometer without proton decoupling. Chemical shifts are reported in ppm relative to CFC1<sub>3</sub>. <sup>13</sup>C NMR spectra were recorded on a Bruker 400 MHz spectrometer with complete proton decoupling. Chemical shifts are reported in ppm relative to TMS as a reference (CDCl<sub>3</sub> = 77.0 ppm). GC/MS analysis was performed using a Agilent 7890A Network GC system coupled to a 5975C Network mass selective detector.

## II, Experimental Procedures

### II-1. Prepare of 1,1,1-trifluoroethane(HFC-143a) **1b**

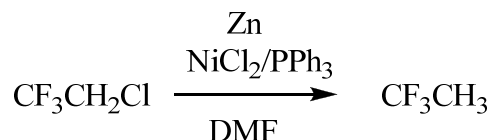

A 3 mL sealed tube was charged with zinc powder (423 mg, 6.5 mmol), NiCl<sub>2</sub> (65 mg, 0.5 mmol) and PPh<sub>3</sub> (530 mg, 2.0 mmol). The sealed tube was filled with nitrogen and the nitrogen purged solvent DMF (1.5 mL) was then added. The mixture was heated to 120 °C for 30 min to form a brown catalyst and cooled to room temperature. The solution of HCFC-133a **1a** (5M in DMF, 1 mL) was added, then the valve of the sealed tube was screwed down. The sealed mixture was stirred at 90 °C for 5 h, then cooled to room temperature. The gas phase was collected using a condensate trap in the liquid nitrogen. About 400 mg product was collected, which contained about 96% CF<sub>3</sub>CH<sub>3</sub> **1b**. The yield was about 92% based on HCFC-133a. GC-MS showed the peak: 84, 83, 69, 65, 64. <sup>19</sup>F NMR (CDCl<sub>3</sub>): -61.0 ppm (q, J = 12 Hz), <sup>1</sup>H NMR: 1.87 ppm (q, J = 12 Hz). Spectra data reported in literature<sup>1</sup>: <sup>19</sup>F NMR: -61.2 ppm (q, J = 13.1 Hz). <sup>1</sup>H NMR: 1.87 ppm (q, J = 12.8 Hz).

### II-2. Prepare of 1,1-trifluoroethane(VDF) **1c**

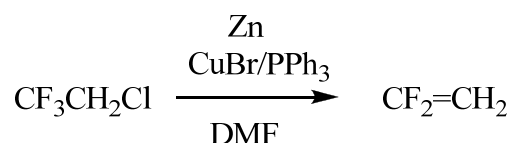

A 3 mL sealed tube was charged with CuBr (72 mg, 0.5 mmol) and PPh<sub>3</sub> (530 mg, 2 mmol). The sealed tube was filled with nitrogen and the nitrogen purged solvent DMF (1.5 mL) was then added. The mixture was heated to 100 °C about 30 min until it was colorless, then cooled to room temperature. Zinc powder (489 mg, 7.5 mmol) and the solution of HCFC-133a **1a** (5M in DMF, 1 mL) was added, then the valve of the sealed tube was screwed down. The sealed mixture was heated at 150 °C for 6 h and cooled to room temperature. The gas phase was obtained with a gasometer. About 103 mL gas (4.6 mmol, converted to standard state: 273.15 K, 1 atm). The GC-MS showed only CF<sub>2</sub>=CH<sub>2</sub> **1c** was contained in the gas phase. The yield was about 92% based on HCFC-133a. GC-MS showed the peak: 64, 45, 44, 43. <sup>19</sup>F NMR: (CDCl<sub>3</sub>): -81.0 ppm (m), <sup>1</sup>H NMR: 3.84 ppm (dd, J = 25, 10 Hz) Spectra data reported in literature<sup>2</sup>: <sup>19</sup>F NMR: (CDCl<sub>3</sub>): -81.9 ppm.

### II-3. Absorption of VDF using Br<sub>2</sub>

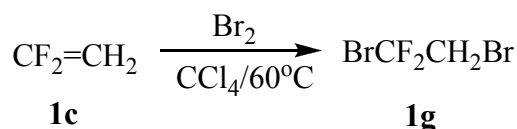

A 3mL sealed tube was charged with CuBr(72mg, 0.5mmol) and PPh<sub>3</sub>(530mg, 2mmol). The sealed tube was filled with nitrogen and the nitrogen purged solvent DMF (1.5 mL) was then added. The mixture was heated to 100°C about 30min until it was colorless, then cooled to room temperature. Zinc powder (489mg, 7.5mmol) and the solution of HCFC-133a **1a** (5M in DMF, 1mL) was added. The mixture was heated at 150°C for 6h and cooled to room temperature. The gas phase was bubbled into Br<sub>2</sub> (1.2g, 7.5mmol) in the 5mL CCl<sub>4</sub> in a 10mL schlenk tube at 60°C for 2h slowly. The mixture was washed with the saturated aqueous solution of Na<sub>2</sub>S<sub>2</sub>O<sub>3</sub> and water, dried over Na<sub>2</sub>SO<sub>4</sub>. The mixture was distilled at atmospheric pressure to give BrCF<sub>2</sub>CH<sub>2</sub>Br 0.649g (2.9mmol, 58%). <sup>19</sup>FNMR: -50.4ppm (t, J=13Hz), <sup>1</sup>HNMR: 4.03 ppm (t, J=13Hz). Spectra data reported in literature<sup>3</sup>: <sup>19</sup>FNMR: -49.1ppm (t, J=13Hz), <sup>1</sup>HNMR: 4.10ppm (t, J=13Hz).

#### II-4. Prepare of (2-bromo-4-methylphenyl)(1-chloro-2,2,2-trifluoroethyl)sulfane **2a**

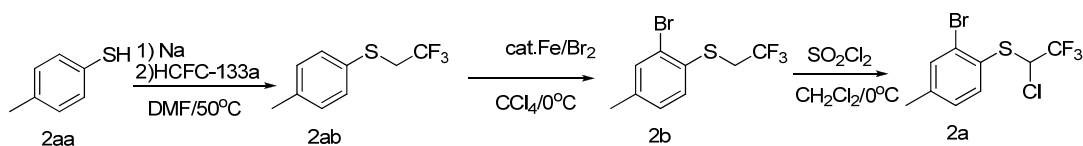

##### II-4-1 Prepare of p-tolyl(2,2,2-trifluoroethyl)sulfane<sup>4</sup> **2ab**

A 100mL schlenk tube was charged with **2aa**(100mmol, 12.4g) and filled with N<sub>2</sub>, then nitrogen purged solvent DMF (60 mL) and sodium(106mmol, 2.44g) was added. The mixture was stirred at room temperature until the sodium disappeared. The solution of HCFC-133a (150mmol, 5M in DMF) was added to the tube. The mixture was stirred at 50°C for 10h. After the reaction was over, the mixture was poured into 500mL of Et<sub>2</sub>O. The resulted solution was washed with water, dried over Na<sub>2</sub>SO<sub>4</sub> and evaporated in a vacuo. The mixture was distilled at reduced pressure to afford **2ab**<sup>5</sup> (77mmol, 15.8g, 77%yield). <sup>19</sup>FNMR: (CDCl<sub>3</sub>): -65.8ppm (t, J=10Hz), <sup>1</sup>HNMR: 2.34ppm (s, 3H), 3.37(q, J=10Hz, 2H), 7.40(d, J=8Hz, 2H), 7.13(d, J=8Hz, 2H).

##### II-4-2 Prepare of (2-bromo-4-methylphenyl)(2,2,2-trifluoroethyl)sulfane **2b**

A 50mL schlenk tube was charged with Fe power (2mmol, 0.112g) and filled with N<sub>2</sub>, then 10mL CCl<sub>4</sub> and **2ab** (20mmol, 5.12g) was added. The mixture was cooled to 0°C and Br<sub>2</sub> (23mmol, 3.68g in 5mL CCl<sub>4</sub>) was dropped slowly. The mixture was stirred vigorously at 0°C for about 2h detected by TLC. After the reaction was over, the mixture was poured into 100mL CH<sub>2</sub>Cl<sub>2</sub>, washed with the saturated aqueous solution of Na<sub>2</sub>S<sub>2</sub>O<sub>3</sub> and water, dried over Na<sub>2</sub>SO<sub>4</sub>. The solvent was removed and the residue was purified by flash chromatography on a silica gel column using n-hexane

as the eluent. **2b** (17.8mmol, 5.07g, 89%yield) was obtained as colorless oil.

IR (KBr):2947, 2924, 1590, 1464, 1380, 1266, 1241, 1126, 1081, 848, 817, 638  $\text{cm}^{-1}$ .

$^{19}\text{F}$ NMR (282MHz,  $\text{CDCl}_3$ ): -66.3 (q,  $J=10\text{Hz}$ ).

$^1\text{H}$ NMR(400MHz,  $\text{CDCl}_3$ ): 2.32 (s, 3H), 3.44(q,  $J=10\text{Hz}$ , 2H),7.09(d,  $J=8\text{Hz}$ ,1H), 7.46- 7.48 (m, 2H).

$^{13}\text{C}$ NMR(100MHz,  $\text{CCl}_3$ ): 140.52, 134.09, 134.06, 130.29, 128.96, 127.46, 125.42(q,  $J=278\text{Hz}$ ), 37.15(q,  $J=33\text{Hz}$ ), 20.66.

MS(EI): $m/z=286(\text{M}^+)$ . HRMS (EI)  $\text{M}^+$  calcd for  $\text{C}_{19}\text{H}_8\text{F}_3\text{SBr}$ : 283.9482, found 283.9484.

#### II-4-3 Prepare of ((2-bromo-4-methylphenyl)(1-chloro-2,2,2-trifluoroethyl)sulfane)<sup>6</sup> **2a**

A 10mL schlenk tube was filled with  $\text{N}_2$ , then 7mL  $\text{CH}_2\text{Cl}_2$  and **2b** (10mmol, 2.86g) was added. The mixture was cooled to  $0^\circ\text{C}$  and  $\text{SO}_2\text{Cl}_2$  (10.5mmol, 1.31g in 3mL  $\text{CH}_2\text{Cl}_2$ ) was dropped slowly. The mixture was stirred vigorously at  $0^\circ\text{C}$  for about 2h detected by TLC. After the reaction was over, the mixture was poured into 80mL  $\text{CH}_2\text{Cl}_2$ , washed with washed with the saturated aqueous solution of  $\text{Na}_2\text{CO}_3$  and water, dried over  $\text{Na}_2\text{SO}_4$ . The solvent was removed and the residue was purified by flash chromatography on a silica gel column using n-hexane as the eluent. **2a** (9.1mmol, 2.91g, 91% yield) was obtained as the colorless oil.

IR (KBr):2969, 2952, 1590, 1463, 1380, 1315, 1260, 1208, 1176, 1116, 830, 809, 786, 673  $\text{cm}^{-1}$ .

$^{19}\text{F}$ NMR (282MHz,  $\text{CDCl}_3$ ): -72.7 (d,  $J=7\text{Hz}$ ).

$^1\text{H}$ NMR (400MHz,  $\text{CDCl}_3$ ): 2.38 (s, 3H), 5.38(q,  $J=7\text{Hz}$ , 1H), 7.17(d,  $J=8\text{Hz}$ ,1H), 7.55- 7.60 (m, 2H).

$^{13}\text{C}$ NMR (100MHz,  $\text{CCl}_3$ ): 142.61, 136.76, 134.94, 129.43, 129.24, 127.08, 122.92(q,  $J=280\text{Hz}$ ), 64.23(q,  $J=34\text{Hz}$ ), 20.90.

MS (EI): $m/z=320(\text{M}^+)$ . HRMS (EI)  $\text{M}^+$  calcd for  $\text{C}_{19}\text{H}_8\text{F}_3\text{SBr}$ : 317.9092, found 317.9094.

#### II-4-4: The cleavage C-Cl of ((2-bromo-4-methylphenyl)(1-chloro-2,2,2-trifluoroethyl)sulfane **2a** using $\text{Cu}(0)$ catalyzation

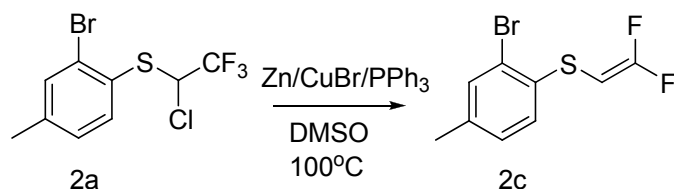

A 10mL schlenk tube was charged with  $\text{CuBr}$ (7.2mg, 0.1mmol) and  $\text{PPh}_3$ (104mg, 0.4mmol). The sealed tube was filled with nitrogen and the nitrogen purged solvent DMSO (4 mL)was then added. The mixture was heated to  $100^\circ\text{C}$  about 30min until it was colorless. Zinc powder (195mg, 3mmol) and **2a**(2mmol, 0.64g) was added. The mixture was heated at  $100^\circ\text{C}$  for 1.5h detected by TLC. After the reaction was over, the mixture was poured into 30mL  $\text{Et}_2\text{O}$ , washed with water, dried over  $\text{Na}_2\text{SO}_4$ . The

solvent was removed and the residue was purified by flash chromatography on a silica gel column using n-hexane as the eluent. **2c** (1.76mmol, 0.466g, 88% yield) was obtained as straw yellow oil.

IR (KBr): 3062, 2922, 1705, 1463, 1381, 1315, 1260, 1208, 1176, 1116, 1023, 961, 809, 786, 673, 536  $\text{cm}^{-1}$ .

$^{19}\text{F}$ NMR (282MHz,  $\text{CDCl}_3$ ): -74.3 (d,  $J=13\text{Hz}$ , 1F), -77.9(dd,  $J=20, 13\text{Hz}$ , 1F).

$^1\text{H}$ NMR (300MHz,  $\text{CDCl}_3$ ): 2.30 (s, 3H), 5.11(d,  $J=20\text{Hz}$ , 1H), 7.07-7.14(m, 2H), 7.37 (s, 1H).

$^{13}\text{C}$ NMR (100MHz,  $\text{CCl}_4$ ): 159.52(dd,  $J=300, 295\text{Hz}$ ), 137.74, 133.61, 132.96, 128.85, 127.69, 121.88, 72.71(dd,  $J=33, 20\text{Hz}$ ), 20.53.

MS (EI):  $m/z=266(\text{M}^+)$ . HRMS (EI)  $\text{M}^+$  calcd for  $\text{C}_{19}\text{H}_8\text{F}_3\text{SBr}$ : 263.9420, found 263.9423.

### III. Reference

- 1, Tanuma, T.; Ohnishi, K.; Okamoto, H.; Morikawa, S. *J. Fluorine Chem.* **1996**, 76, 45.
2. Prakash, G. K. Surya; Hu, Jinbo; Olah, George A. *J. Org. Chem.* **2003**, 68, 4457 .
3. Fokin, A. V.; Studnev, Yu. N.; Rapkin, A. I.; Chilikin, V. G.; Verenikin, O. V. *Bulletin of the Academy of Sciences of the USSR* , **1985**, 601.
- 4, Long, Z. -Y.; Chen, Q.-Y. *J. Fluorine Chem.* **1998**, 91, 95.
- 5, Kato, M.; Maeda, K.; Sato, K.; Omote, M.; Ando, A.; Kumadaki, I. *Chem. Pharm. Bull.*, **2000**, 48, 683.

### IV. GC-MS spectral for HFC-143a and VDF

面积百分比报告  
 Area Percent

(File)  
 数据文件 : 2007159.D  
 采集 (Date) 23 Sep 2009 15:23  
 操作者 (Operator)  
 样品 (Sample)  
 其他 (Others)  
 ALS 样品瓶: 1 样品乘因子: 1  
 Sample Number (Product Factor)  
 积分参数 : autoint1.e  
 积分器 : 化学工作站 (CHEM WORKSTAIN)  
 方法 (Methods) F:\methods\80-300.M  
 标题 :

信号: TIC: 2007159.D\data.ms

| 峰 #  | R.T. 分钟 | 起始扫描  | TOP 扫描 | Stop Scanning 截止扫描 | 峰 (Peak) 峰类型   | 峰高       | 修正面积 总面积  | 修正面积 %占最大值 | % 比总数   |
|------|---------|-------|--------|--------------------|----------------|----------|-----------|------------|---------|
| Peak | min     | Start | Top    | Stop               | Height of Peak | Height   | Area      | Area %     | Percent |
| 1    | 0.331   | 7     | 64     | 195                | M              | 69769    | 7696096   | 3.35%      | 3.238%  |
| 2    | 1.390   | 509   | 534    | 571                | M3             | 12175506 | 229596835 | 100.00%    | 96.589% |
| 3    | 1.493   | 572   | 579    | 590                | M5             | 14848    | 185185    | 0.08%      | 0.078%  |
| 4    | 1.585   | 610   | 620    | 633                | M5             | 18450    | 226793    | 0.10%      | 0.095%  |

Sum of Corrected Area  
 修正后的面积和: 237704910

80-300.M Wed Sep 23 16:03:06 2009

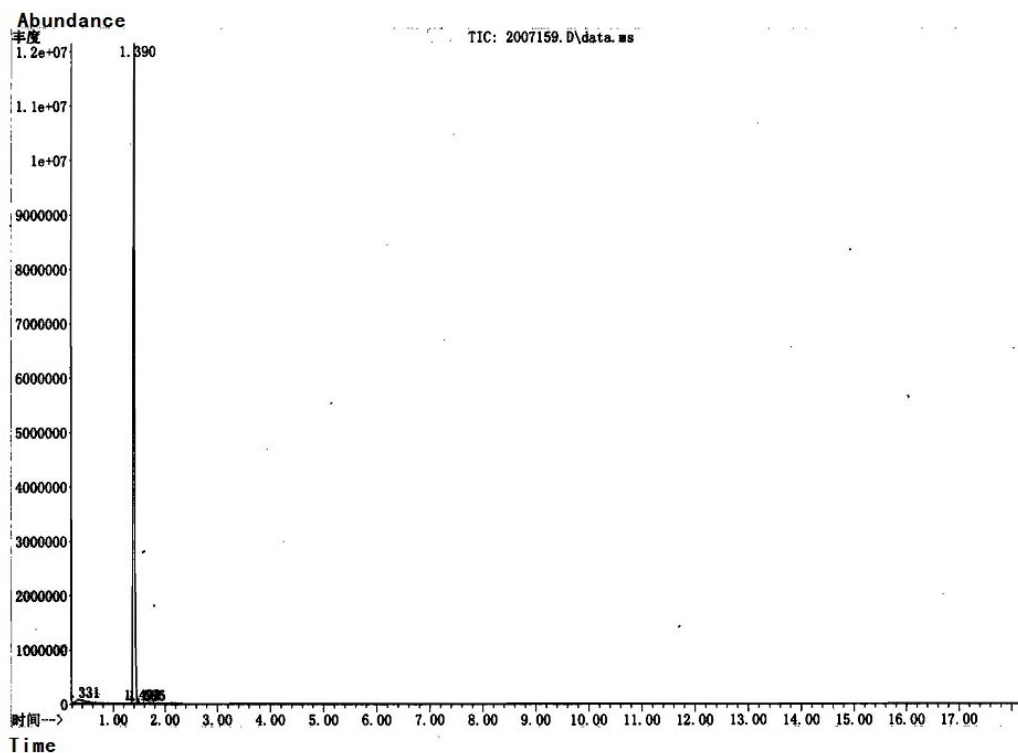

Gas phase product of Ni(0) catalytic system



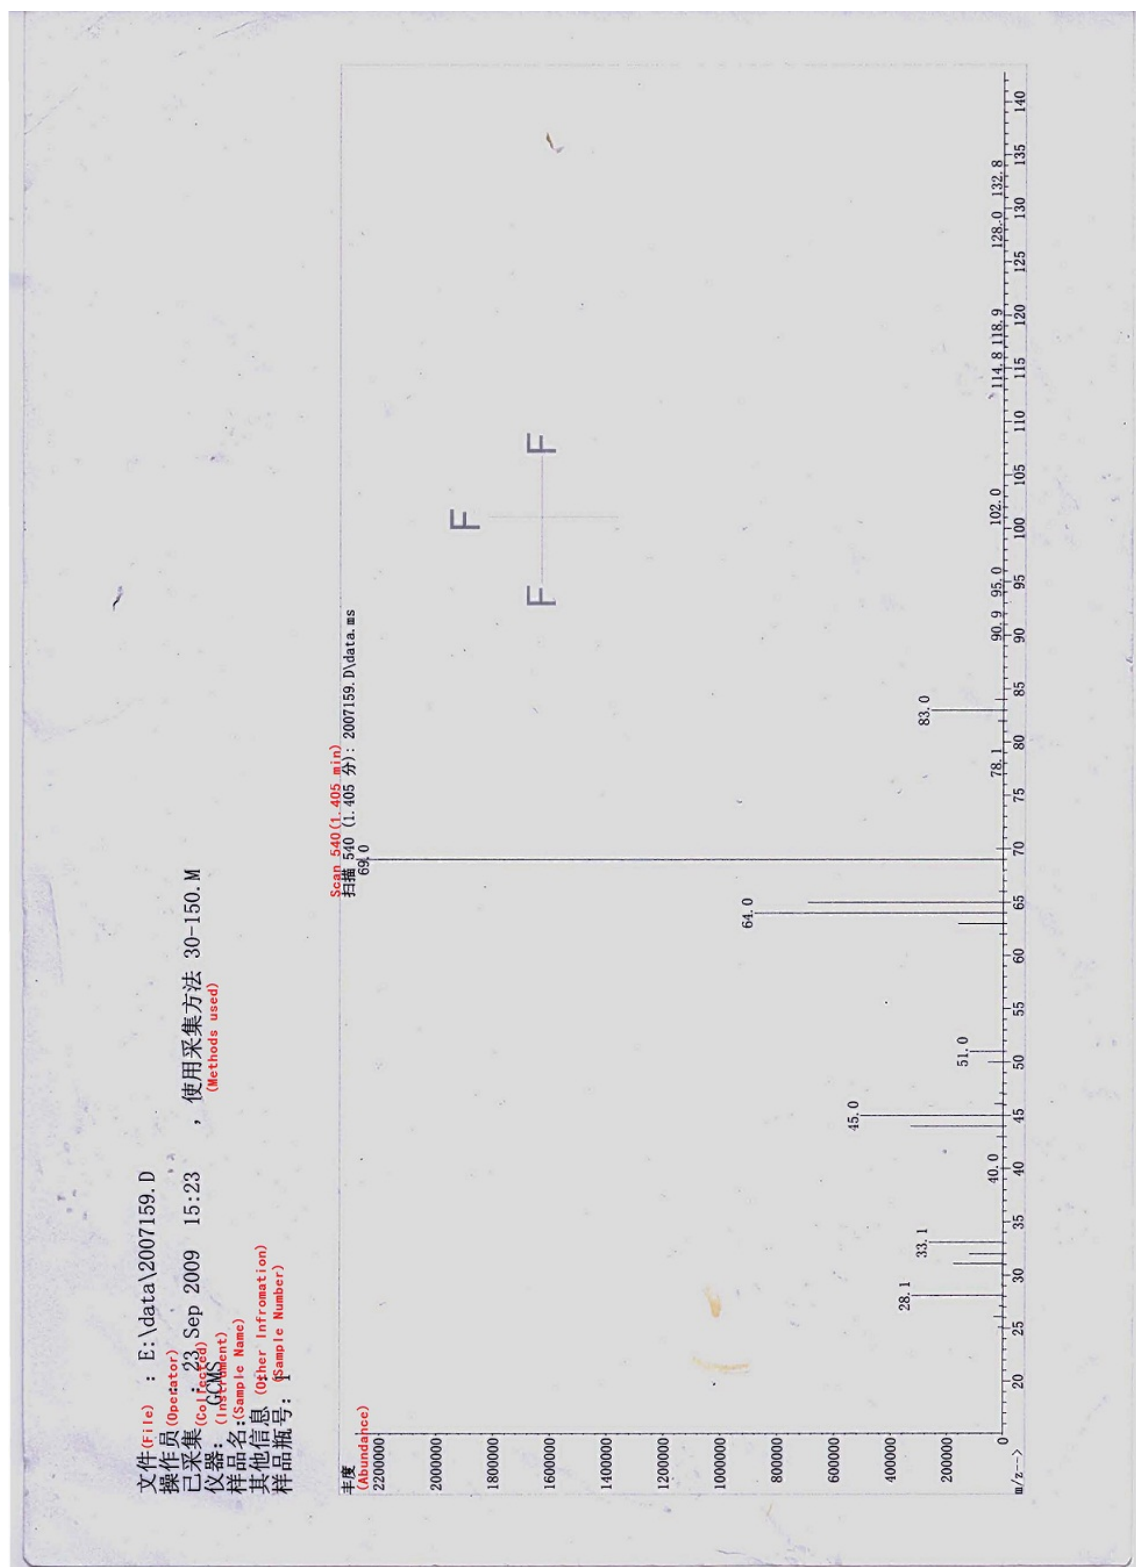

Mass Spectra of HFC-143a

文件 (File): E:\data\2007159-FLUENE-GCMS.D  
操作员 (Operator)  
已采集 (Collected) 2010 9:09 , 使用采集方法 30-70.M  
仪器: (GCMS) Methods used  
样品名: (Sample Name)  
其他信息 (Other Information)  
样品瓶号: (Sample Number)

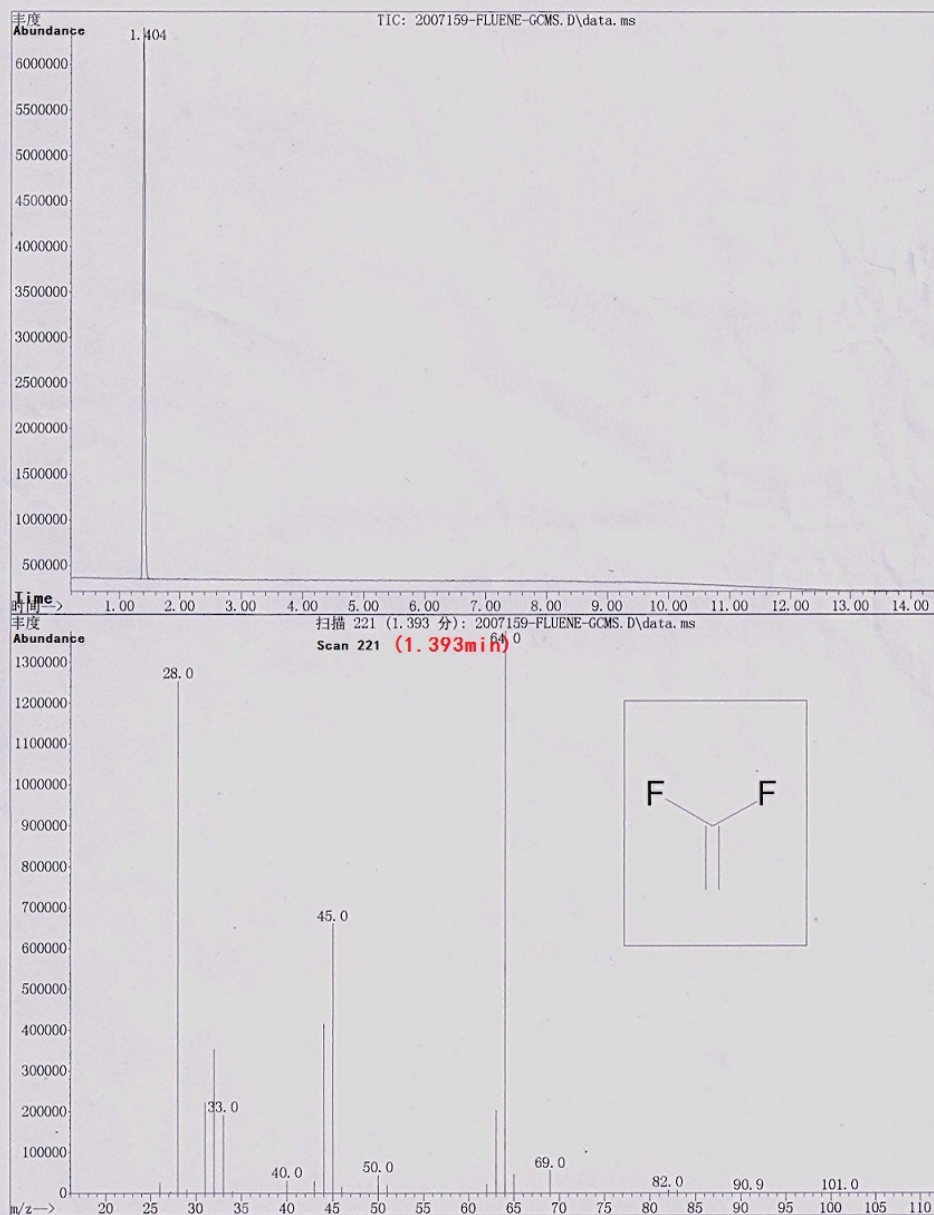

GC/MS spectra of Cu(0) catalytic system

## V. Spectral Data for new compounds

66.318  
66.282  
66.245

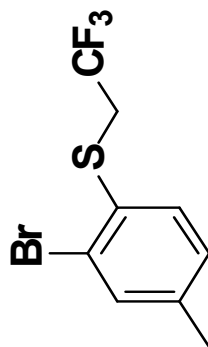

Aug 28 2011  
USER: tj  
SOLVENT: CDCl3  
Experiment = s2pul  
Pulse length = 6.167 usec  
Recycle delay = 1.500 sec  
NA = 16  
Solvent = CDCl3  
PTS1d = 32768  
F1 = 282.307831 MHz  
F2 = 300.054321 MHz  
SW1 = 64935.07 Hz  
AT1 = 0.50 sec  
SW2 = 1.00 Hz  
Hz per Pt 1stD = 1.98 Hz  
Hz per Pt 2ndD = 1.00 Hz  
O1 = -23998.1973 Hz  
O2 = -0.5000 Hz  
LB1 = 1.00 Hz  
TP A = 92.69  
B = -104.06  
C = 0.00

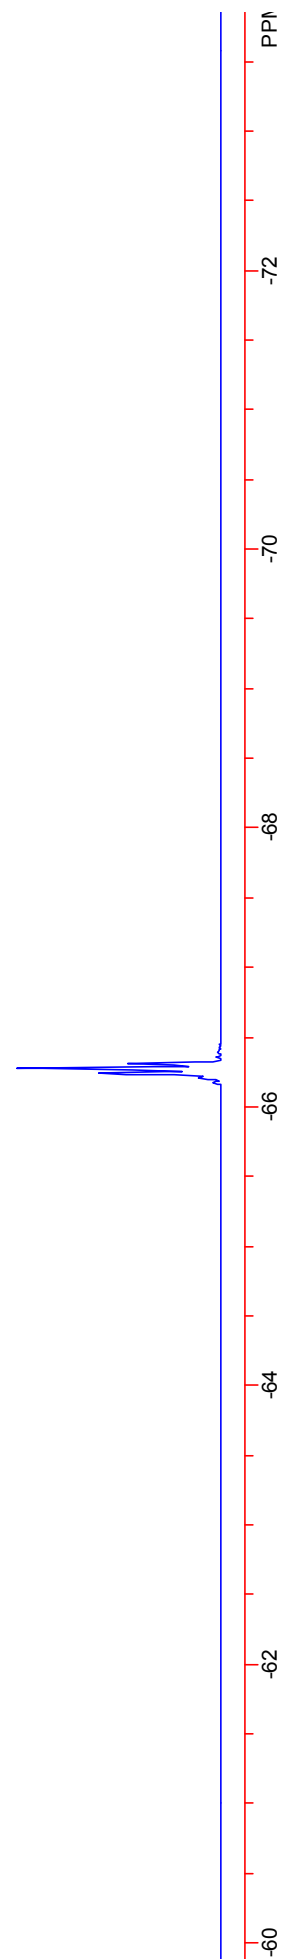

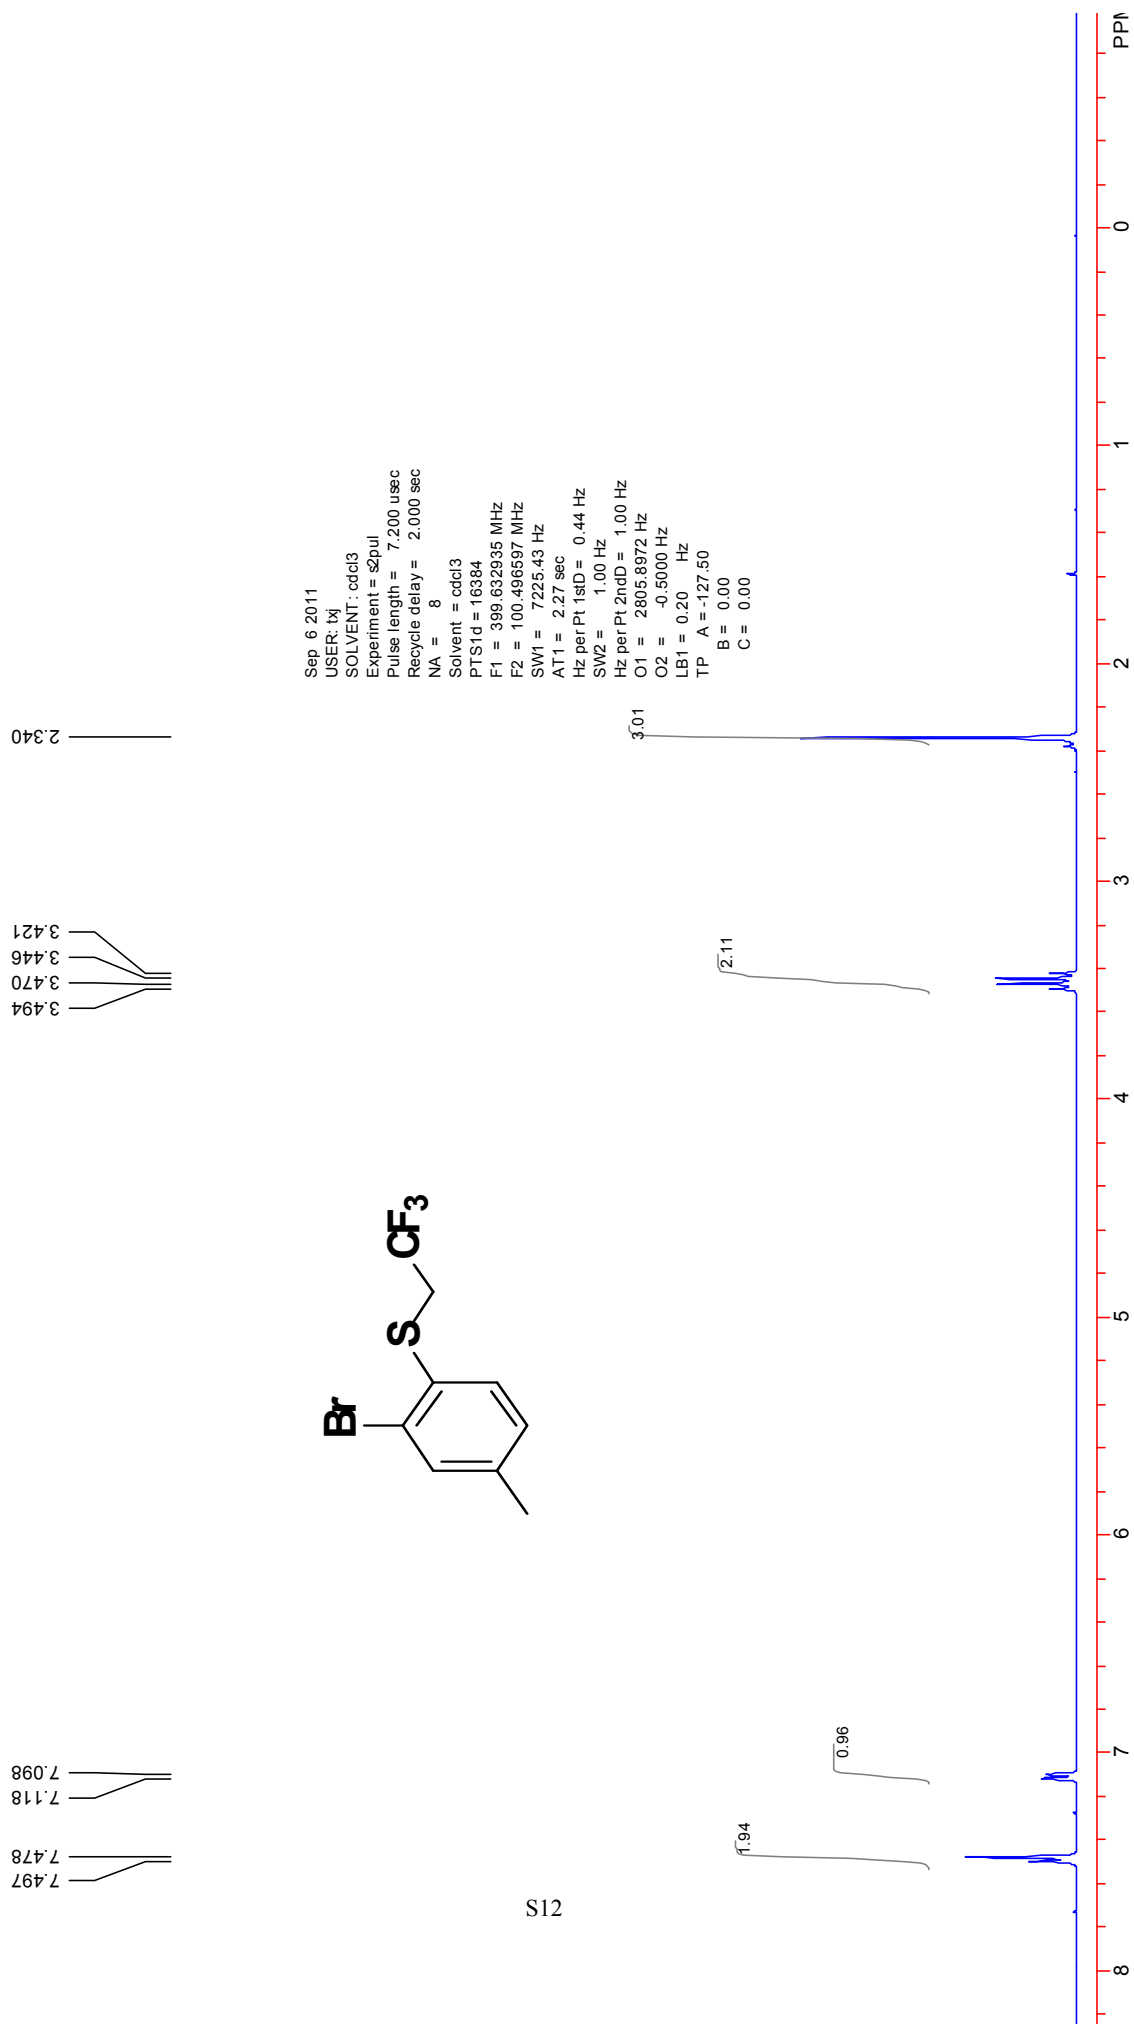

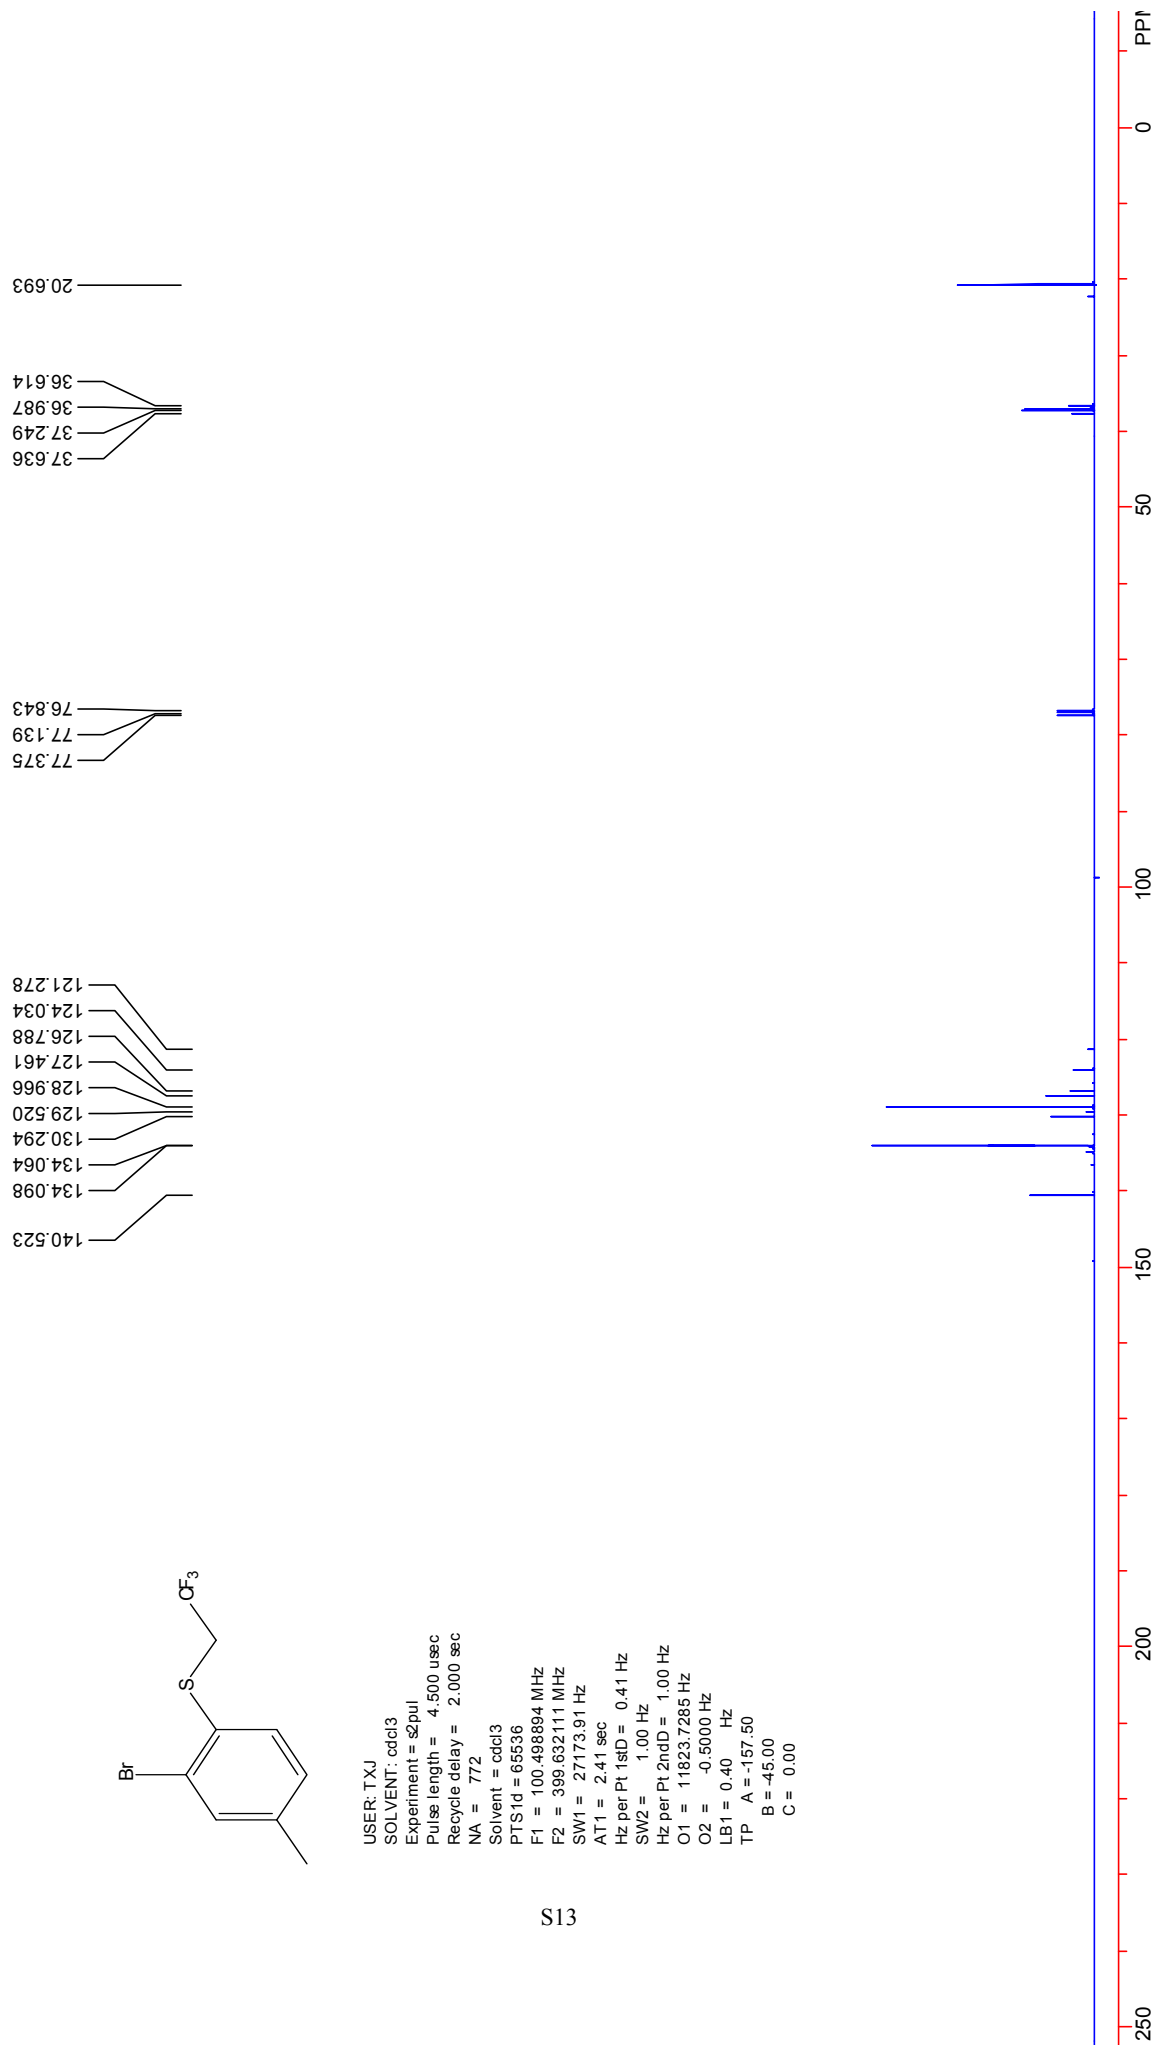

-72.733  
-72.755

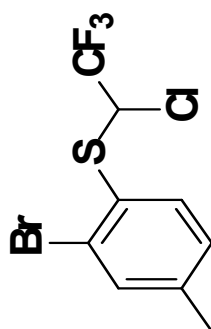

Aug 28 2011  
USER: TXJ  
SOLVENT: CDCl3  
Experiment = s2pul  
Pulse length = 6.167 usec  
Recycle delay = 1.500 sec  
NA = 16  
Solvent = CDCl3  
PTS1d = 32768  
F1 = 282.307831 MHz  
F2 = 300.054321 MHz  
SW1 = 64935.07 Hz  
AT1 = 0.50 sec  
Hz per Pt 1stD = 1.98 Hz  
SW2 = 1.00 Hz  
Hz per Pt 2ndD = 1.00 Hz  
O1 = -23988.1973 Hz  
O2 = -0.5000 Hz  
LB1 = 3.00 Hz  
TP A = 112.50  
B = 22.50  
C = 0.00

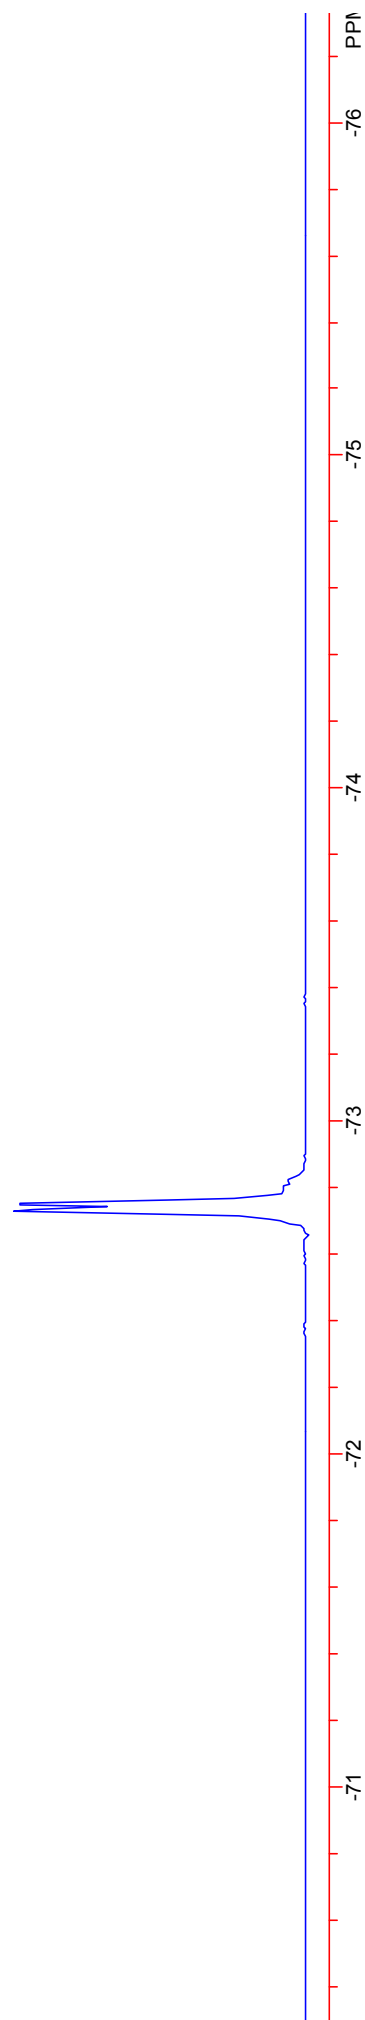

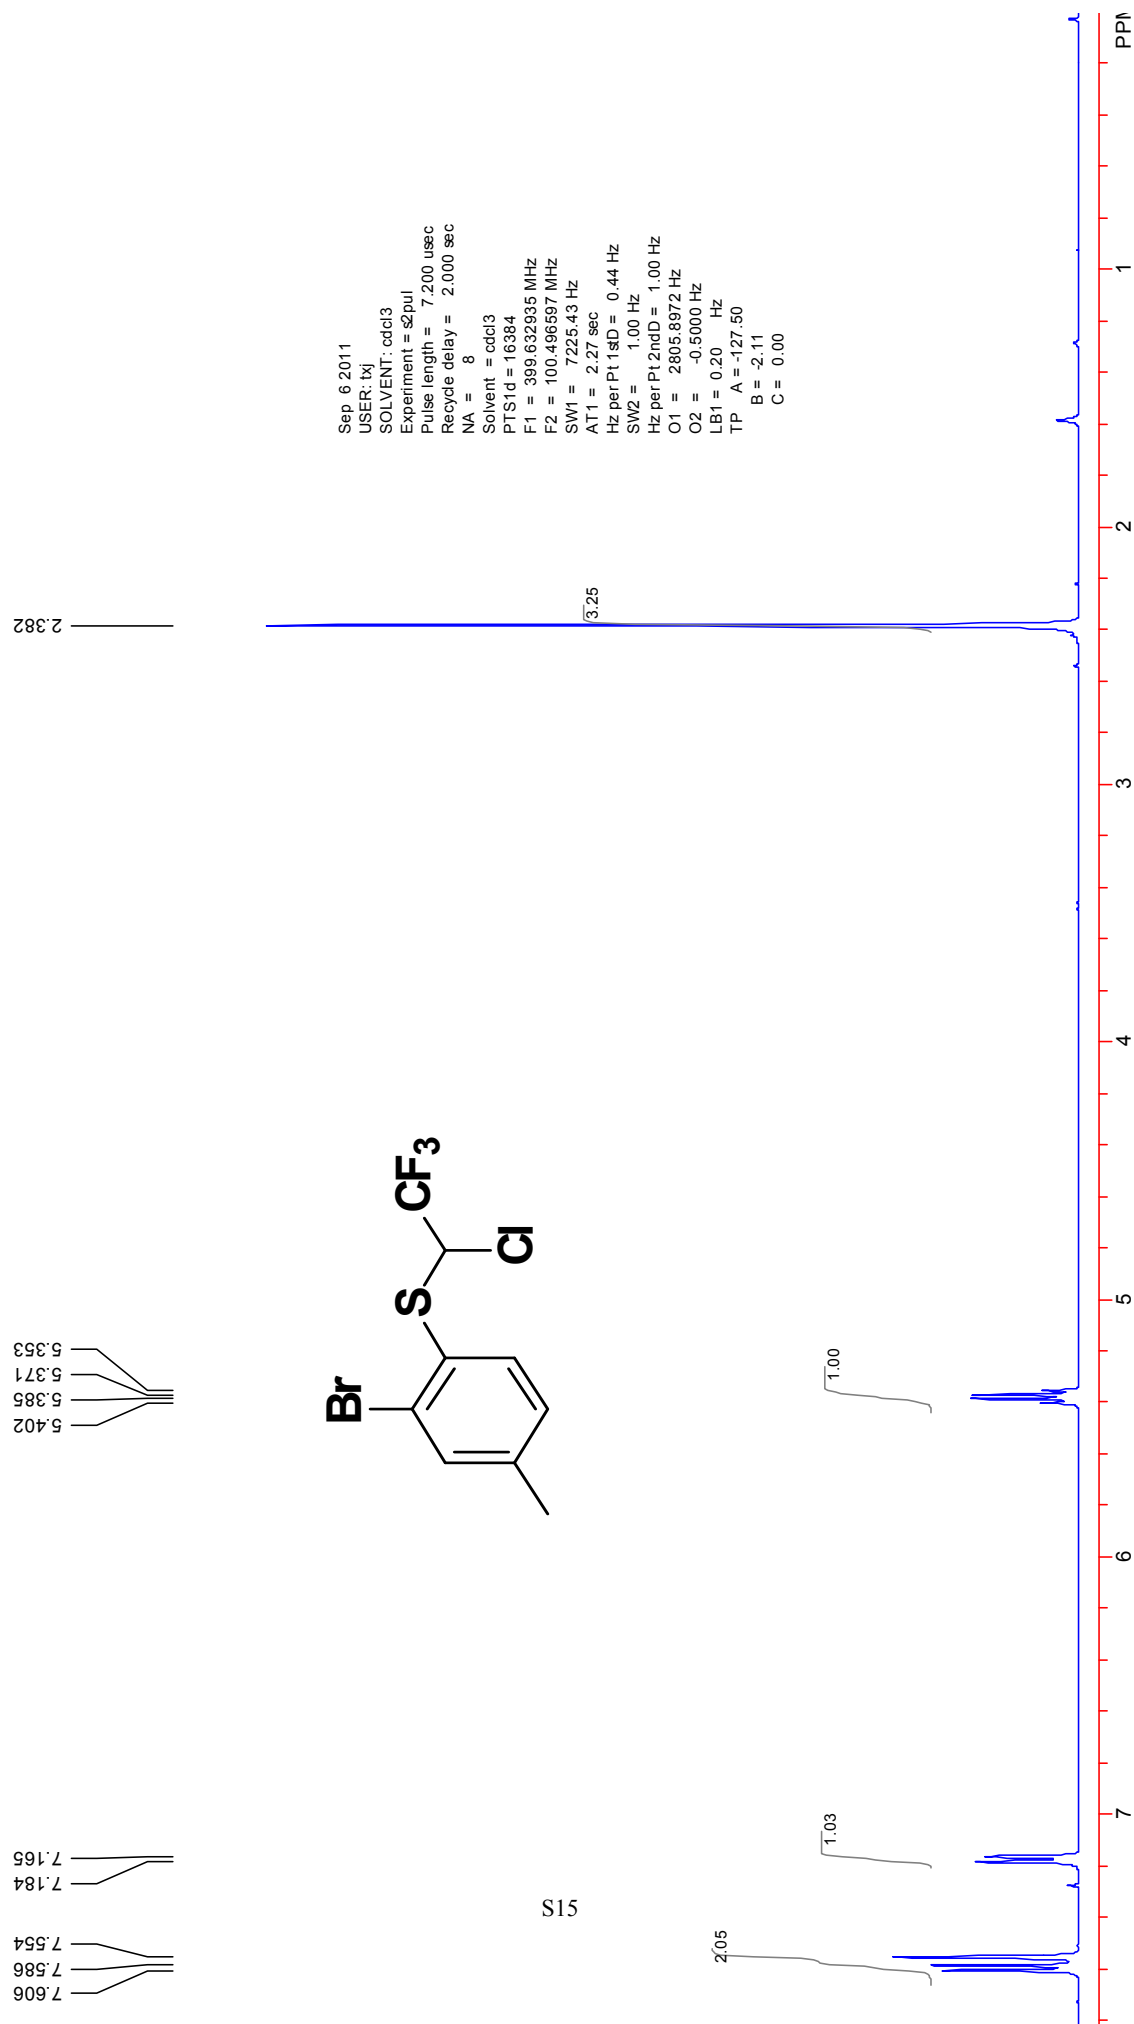



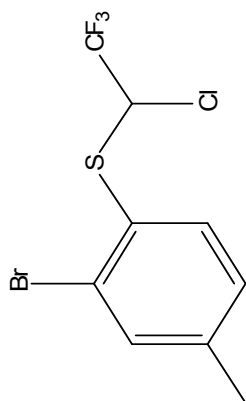

USER: txj  
SOLVENT: cdcl3  
Experiment = s2pul  
Pulse length = 4.500 usec  
Recycle delay = 2.000 sec  
NA = 644  
Solvent = cdcl3  
PTS1d = 66536  
F1 = 100.498894 MHz  
FZ2 = 399.632111 MHz  
SW2 = 27173.91 Hz  
AT1 = 2.41 sec  
Hz per Pt1SD = 0.41 Hz  
SW2 = 1.00 Hz  
Hz per Pt2ndD = 1.00 Hz  
O1 = 11823.7285 Hz  
O2 = -0.5000 Hz  
LB1 = 0.40 Hz  
TP A = 195.00  
B = -28.13  
C = 0.00

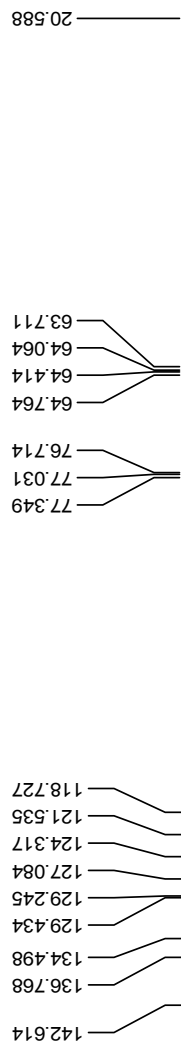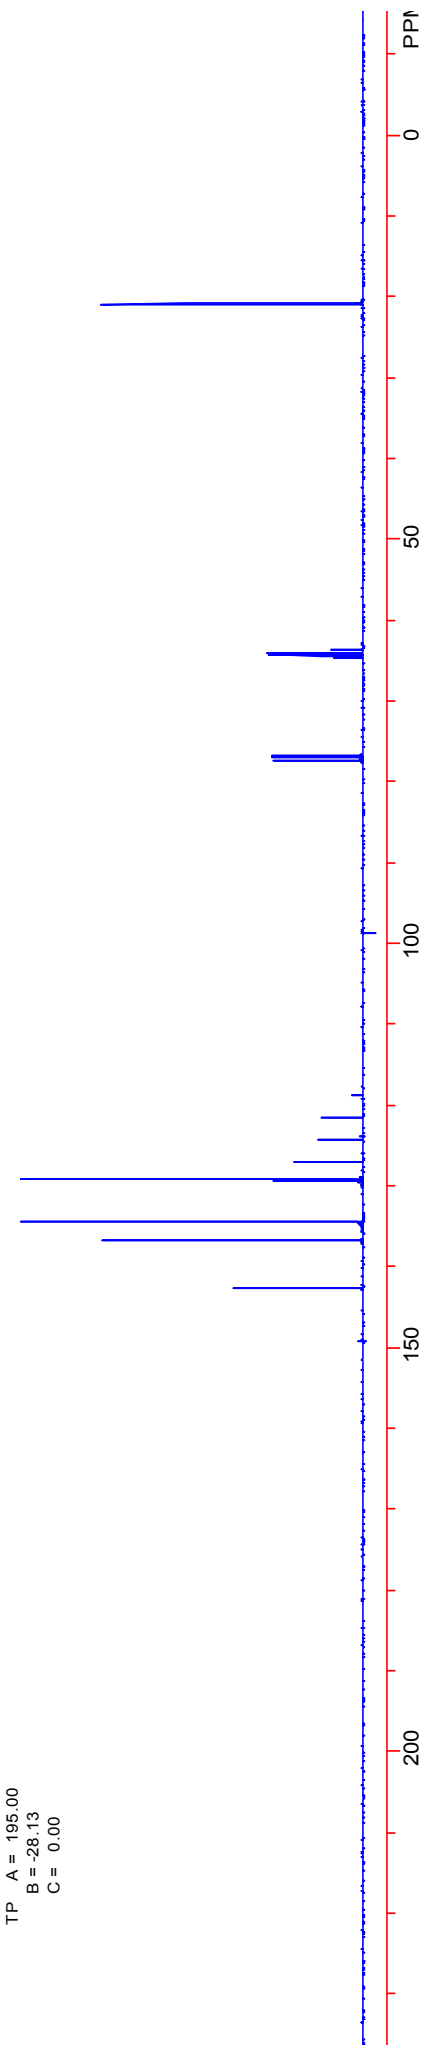

77.986  
77.935  
77.916  
77.860

74.343  
74.291

Jan 10 2011  
USER: txj  
SOLVENT: CDCl3  
Experiment = 2pul  
Pulse length = 6.167 usec  
Recycle delay = 1.500 sec  
NA = 16  
Solvent = CDCl3  
PTS1d = 32768  
F1 = 282.307831 MHz  
F2 = 300.054321 MHz  
SW1 = 64935.07 Hz  
AT1 = 0.50 sec  
Hz per Pt 1stD = 1.98 Hz  
SW2 = 1.00 Hz  
Hz per Pt 2ndD = 1.00 Hz  
O1 = -23998.1973 Hz  
O2 = -0.5000 Hz  
LB1 = 3.00 Hz  
TP A = -747.99  
B = 1884.53  
C = 0.00

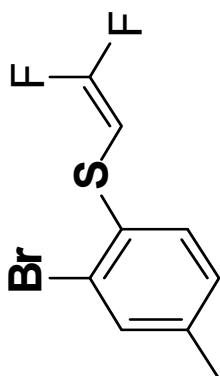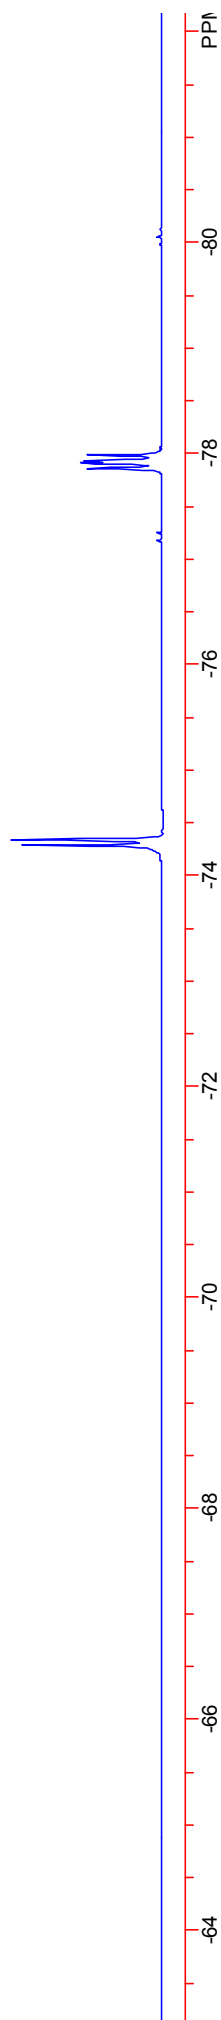

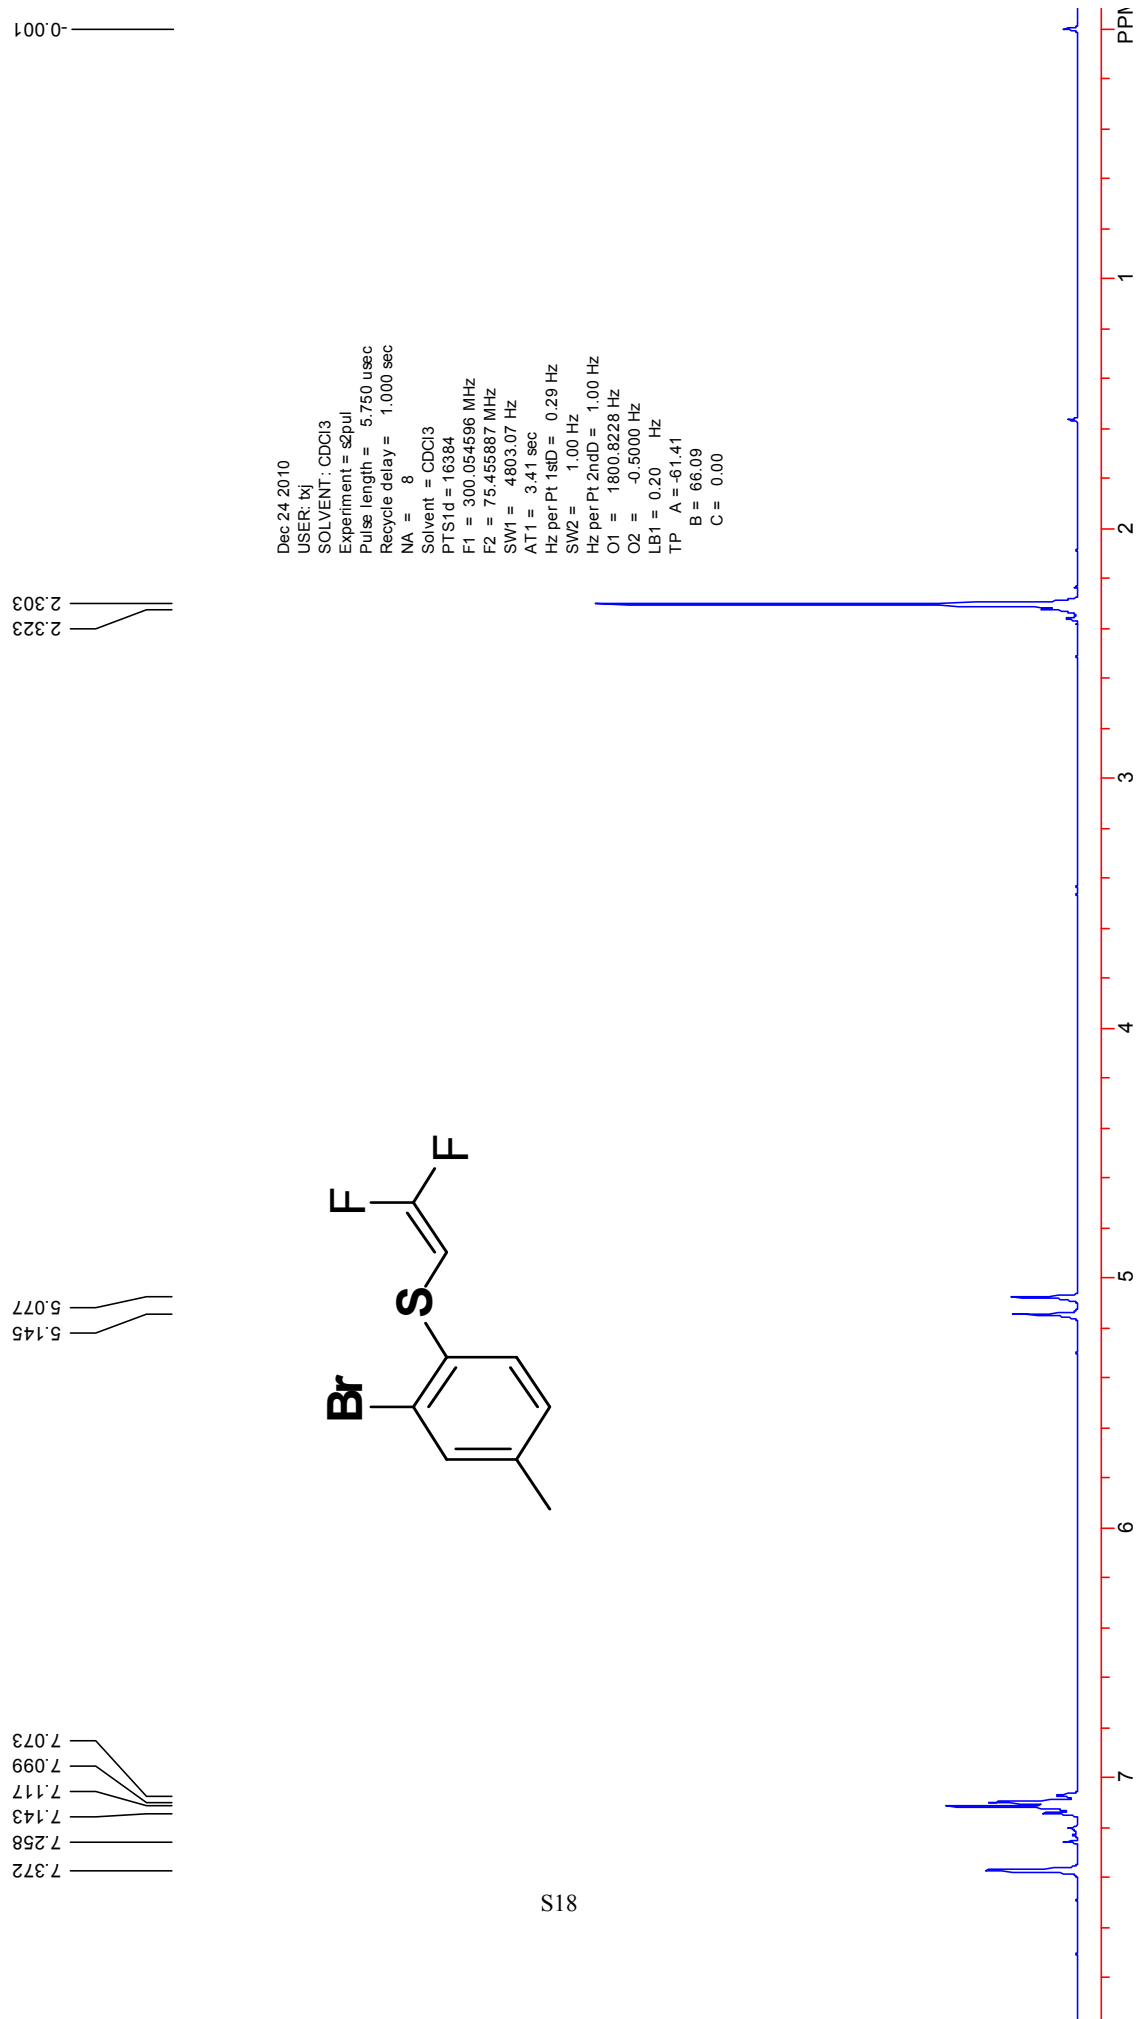

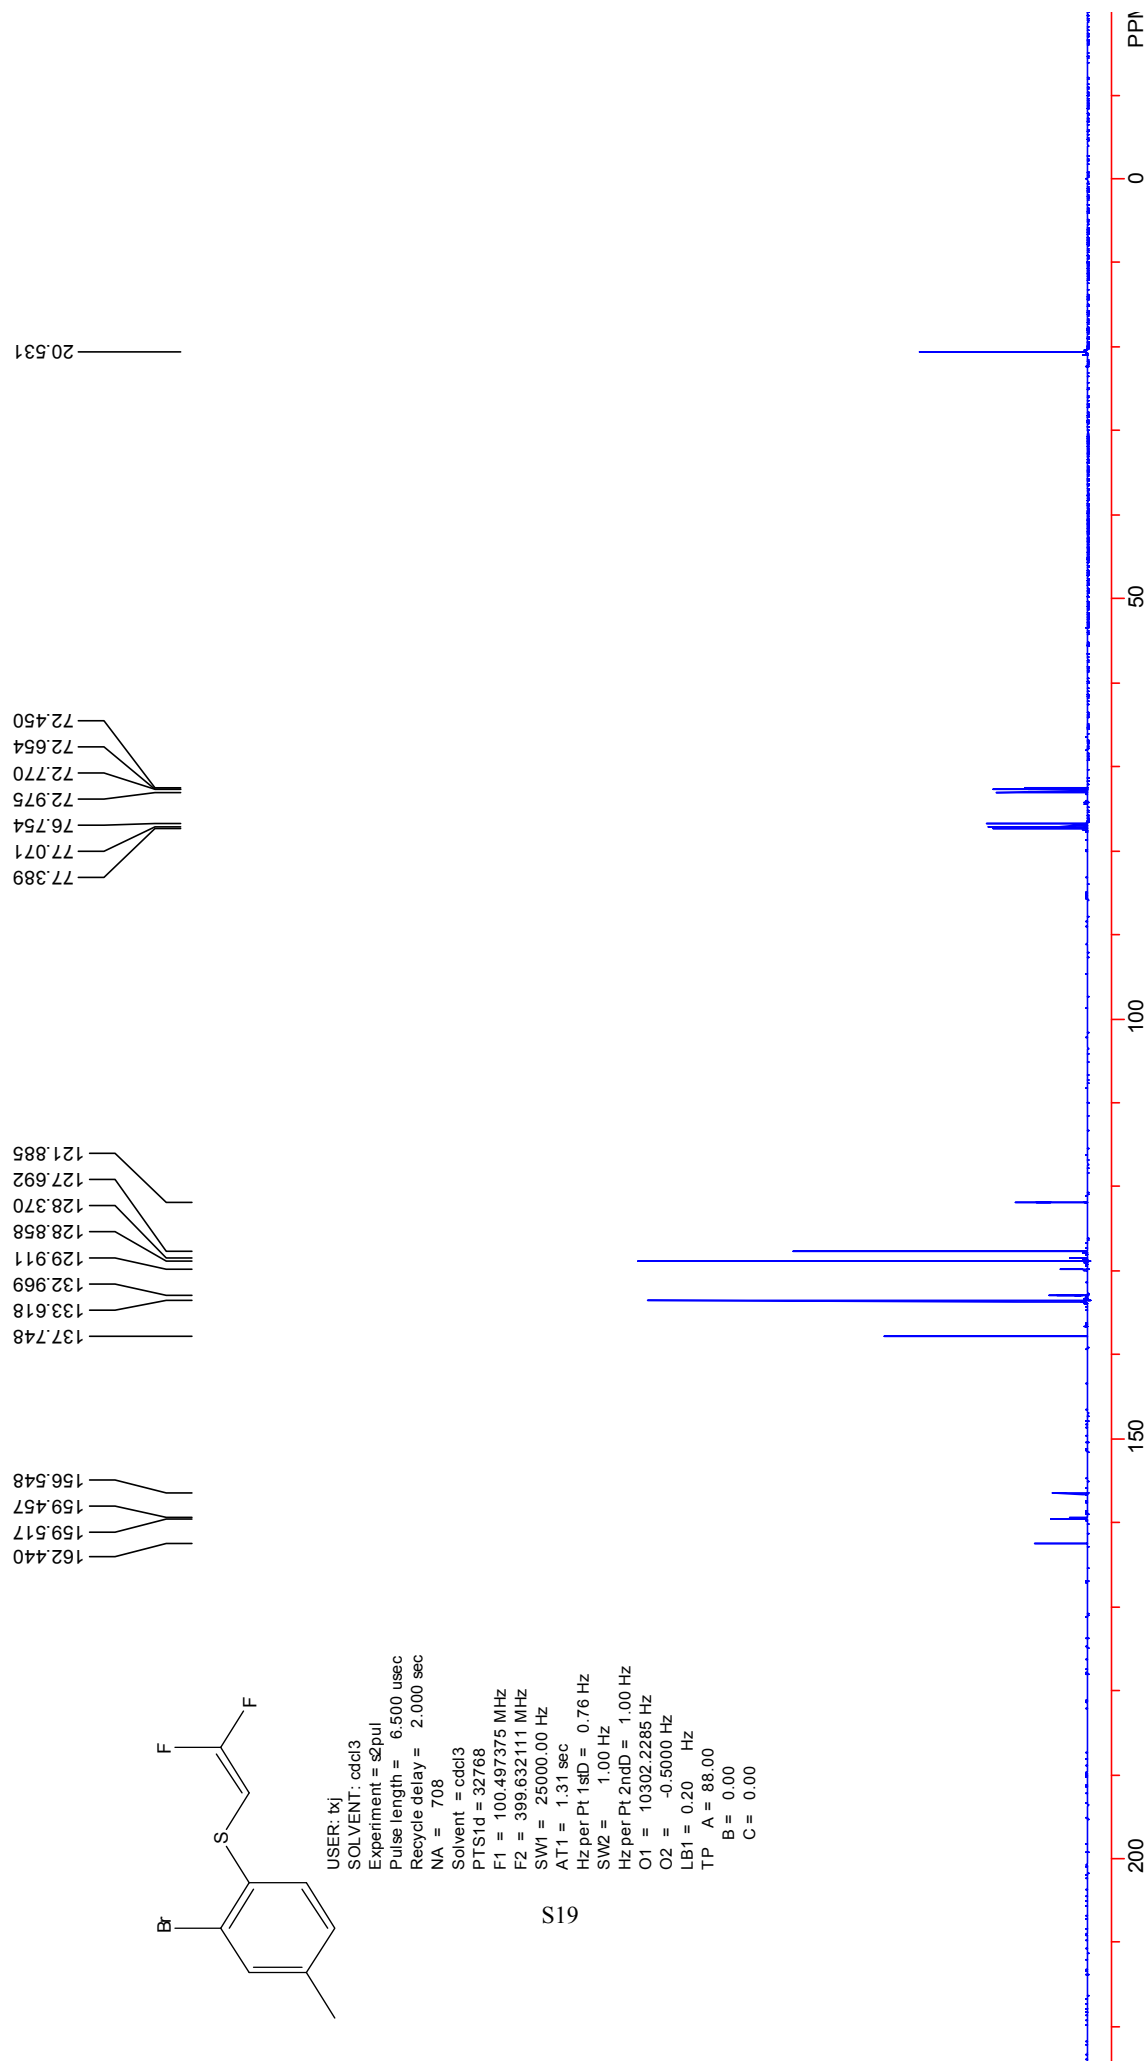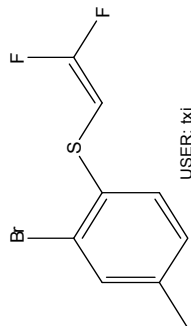

USER: txj  
SOLVENT: cdcl3  
Experiment = s2pul  
Pulse length = 6.500 usec  
Recycle delay = 2.000 sec  
NA = 708  
Solvent = cdcl3  
PTS1d = 32768  
F1 = 100.497375 MHz  
F2 = 399.632111 MHz  
SW1 = 25000.00 Hz  
AT1 = 1.31 sec  
Hz per Pt 1stD = 0.76 Hz  
SW2 = 1.00 Hz  
Hz per Pt 2ndD = 1.00 Hz  
O1 = 10302.2285 Hz  
O2 = -0.5000 Hz  
LB1 = 0.20 Hz  
TP A = 88.00  
B = 0.00  
C = 0.00
